# Supplementary material for: Orf Virus-Based Vaccine Vector D1701-V Induces Strong CD8+ T Cell Response against the Transgene but Not against ORFV-Derived Epitopes
Source: MDPI journal article supplement (doi:10.3390/vaccines8020295), 2020-06-10
Supplement: s1 [file s1]

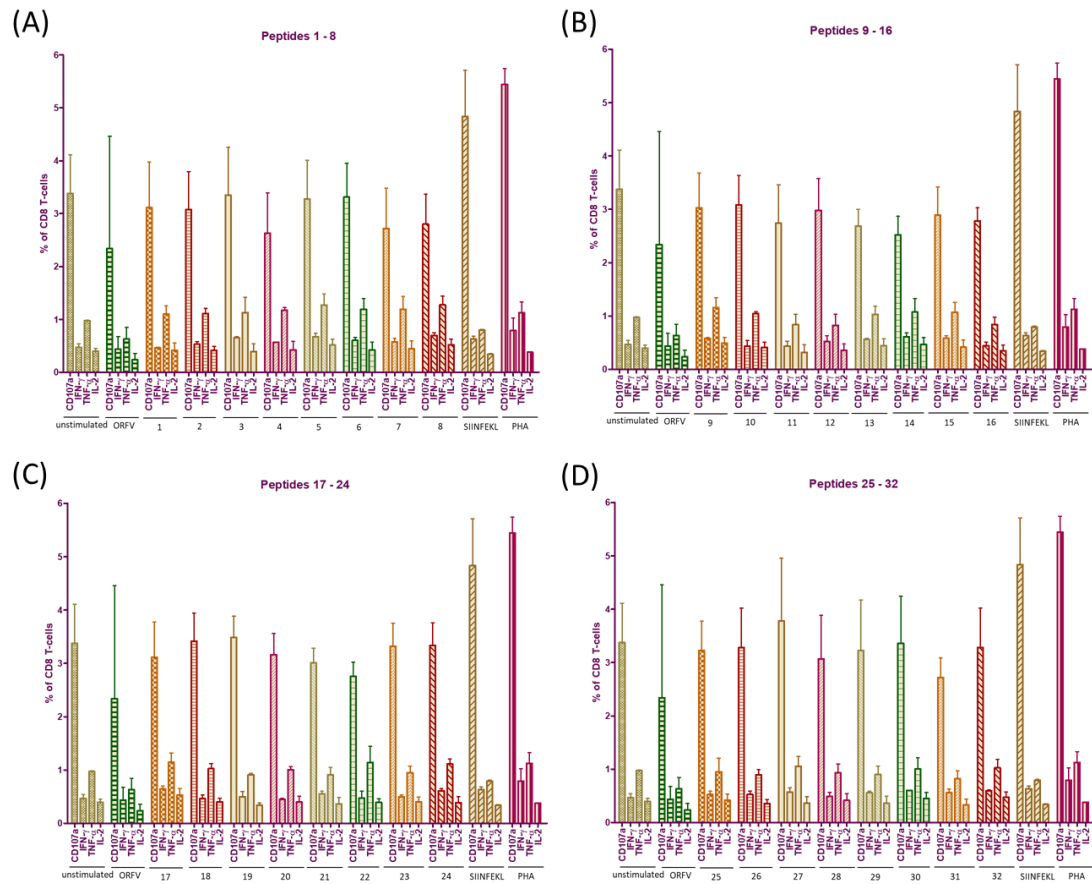

**Figure S1.** CD8<sup>+</sup> T cell responses within 14 days re-stimulated splenocytes from ORFV immunized mice. H-2K<sup>b</sup> C57BL/6 mice ( $n = 6$ ) were immunized twice with V12-Ova-D12-GFP or control ORFV by i.m. route. One week after the second administration isolated pooled splenocytes were re-stimulated during 14 days with the individual ORFV-derived peptides as described in Materials and Methods. Specific cytotoxic T lymphocyte responses were evaluated using intracellular cytokine staining. Percentages of CD107a, TNF- $\alpha$ , IFN- $\gamma$  and IL-2 expressing CD8<sup>+</sup> T cells after stimulation with synthetic peptides (A) 1–8, (B) 9–16, (C) 17–24 and (D) 25–32, control ORFV or Ova<sub>257-264</sub> SIINFEKL peptide. Data are shown as means  $\pm$  SEM of three independent technical replicates. PHA, Phytohemagglutinin; ns, not significant; Ova, ovalbumin; TNF- $\alpha$ , tumor necrosis factor alpha; IFN- $\gamma$ , interferon-gamma; IL-2, interleukin-2.
